# Supplementary material
Source: HighWire-hosted journal article supplement (https://gocm.bmj.com/content/2/3/124)
Supplement: inline-supplementary-material-1 [file inline-supplementary-material-1.docx]

To the Editor,

9th July, 2022.

Dear Sir/Madam,

**Addition of second Author to the Manuscript**

I wish to add a second authors to the manuscript entitled **‘‘COVID-19 vaccination in Pregnancy: A review of Maternal and Infant Benefits ’’.**The author helped in the revision of the manuscript and his details are listed as below.

Ephraim Kumi Senkyire

Ga-West Municipal Hospital, Ghana Health Service, Accra, Ghana

Thank You

Yours Sincerely

Signed

Emmanuel Lamptey

Corresponding Author
